# Supplementary material
Source: PubMed Central journal article supplement (PMC7612847)
Supplement: EMS145499-supplement-Supplementary_Figure_1.pdf [file EMS145499-supplement-Supplementary_Figure_1.pdf]

*B. vulgatus* - Live cells control

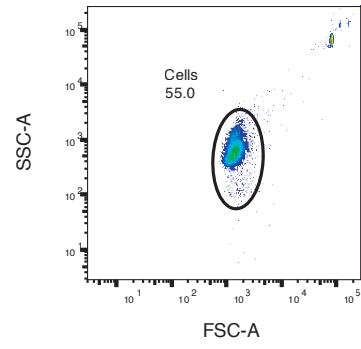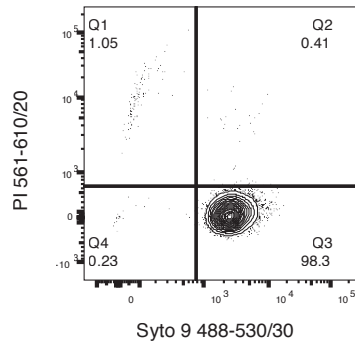

*E. coli* ED1a - Live cells control

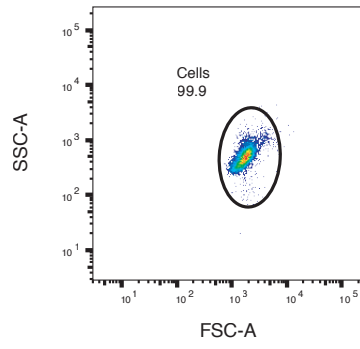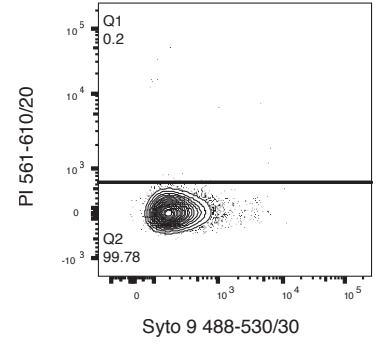

*B. vulgatus* - Dead cells control

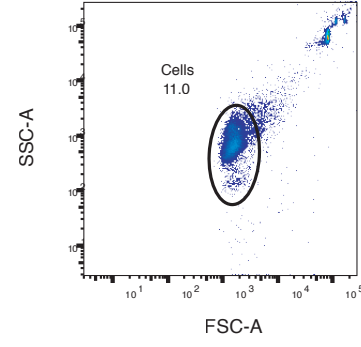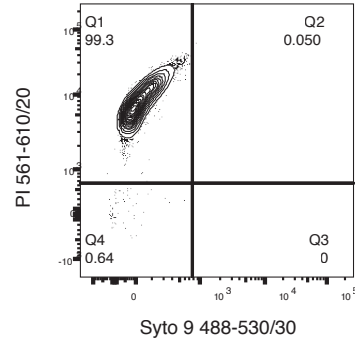

*E. coli* ED1a - Dead cells control

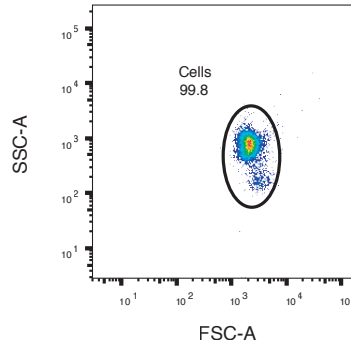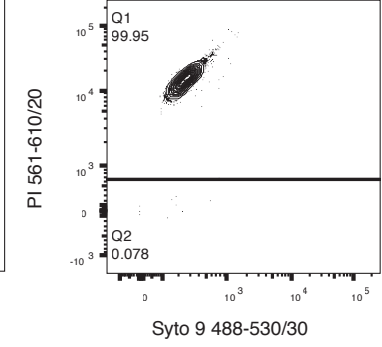

*B. vulgatus* - Erythromycin

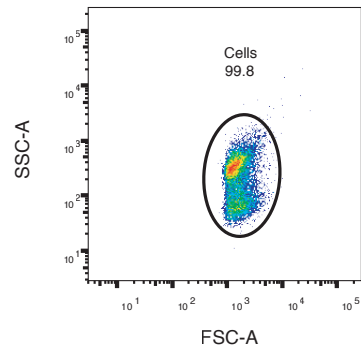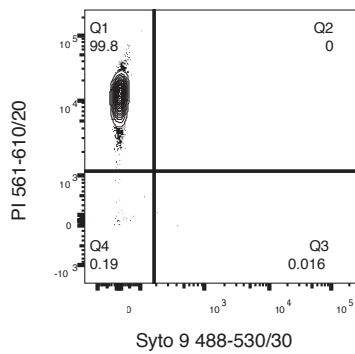

*E. coli* ED1a - Erythromycin

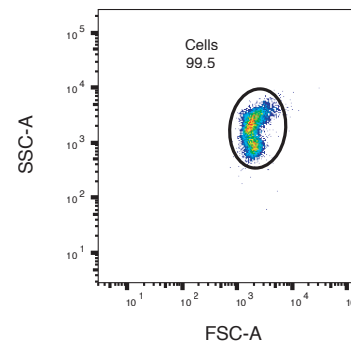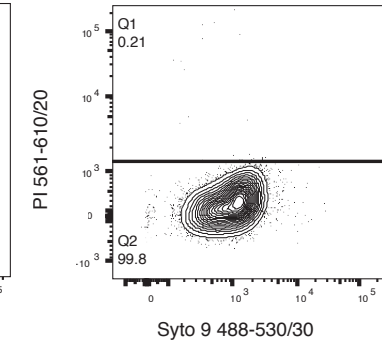

*B. vulgatus* - Azithromycin

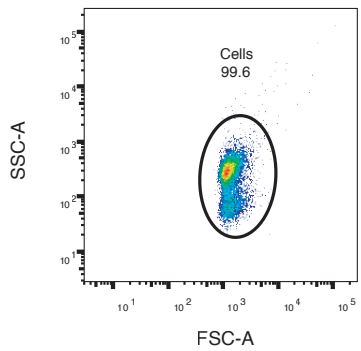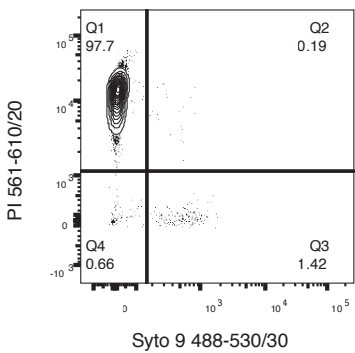

*E. coli* ED1a - Azithromycin

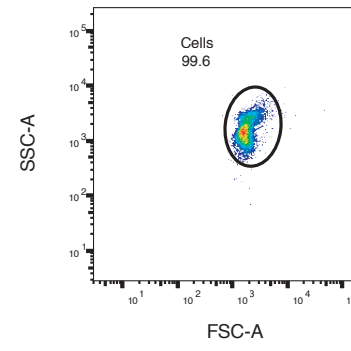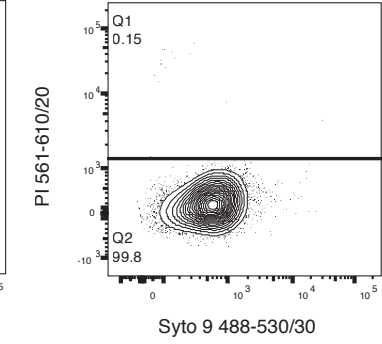

*B. vulgatus* - Doxycycline

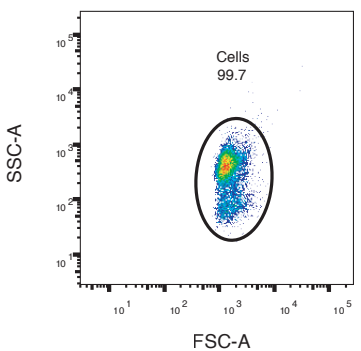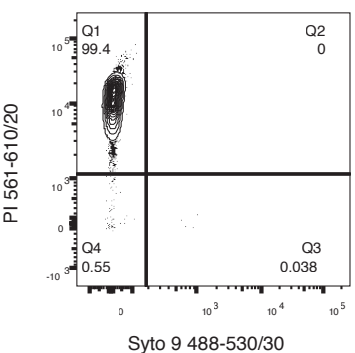

*E. coli* ED1a - Doxycycline

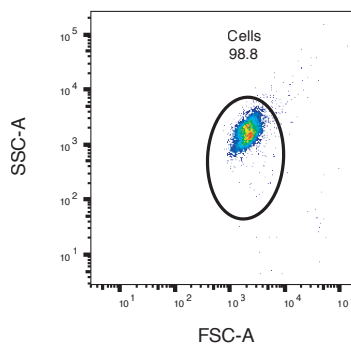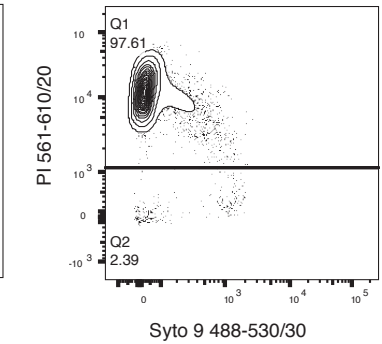

# Supplementary Figure 1

Illustration of the gating strategy
